# Supplementary material
Source: publisher figshare collection journal article supplement (https://karger.figshare.com/ndownloader/files/20324745)
Supplement: Supplementary file 1 [file 20324745]

**Supplement Table 2.** Association of clinical and laboratory variables with urinary tract infection without hospitalization during pregnancy in univariate and multivariate logistic regression models

|  | Unadjusted OR  (95% CI) | Adjusted ORa  (95% CI) |
| --- | --- | --- |
| Age at delivery, ∆ 5 years (ref. age ≤20 years) | **0.91(0.90-0.93)** | **0.98(0.96-1.00)** |
| Primiparity | **1.53(1.48-1.58)** | **1.61(1.55-1.67)** |
| Multiple pregnancy | 0.95(0.84-1.07) | 0.90(0.79-1.01) |
| Obesity (BMI >25 vs. ≤25 ) | **1.11(1.06-1.17)** | **1.16(1.10-1.22)** |
| Previous history of APN treatment | 0.92(0.80-1.05) | **1.23(1.07-1.41)** |
| Smoking status |  |  |
| Never | 1 | 1 |
| Ever | 1.03(0.95-1.12) | 1.02(0.94-1.10) |
| Current | 1.18(1.09-1.28) | **1.09(1.01-1.18)** |
| Systolic BP (>135 vs. ≤135 mmHg) | 1.13(1.07-1.20) | **1.08(1.02-1.15)** |
| Proteinuria |  |  |
| Negative | 1 | 1 |
| ± | 1.03(0.93-1.15) | 1.03(0.93-1.15) |
| 1+ | 1.13(0.98-1.30) | 1.15(1.00-1.32) |
| ≥2+ | 1.11(0.89-1.40) | 1.15(0.92-1.45) |
| Hemoglobin, ∆ 1 g/dL | 1.02(1.00-1.03) | 1.00(0.98-1.01) |
| Fasting glucose (>100 vs. ≤100 mg/dL) | 1.13(0.93-1.37) | 1.10(0.91-1.34) |
| Total cholesterol (>200 vs. ≤200 mg/dL) | 1.01(0.97-1.04) | 1.00(0.96-1.03) |
| Creatinine, ∆ 1 mg/dL | 0.97(0.96-0.99) | 0.97(0.95-0.99) |
| AST (>44 vs. ≤44 IU/L) | 1.06(0.99-1.14) | 1.06(0.97-1.16) |
| ALT (>44 vs. ≤44 IU/L) | 1.02(0.95-1.10) | 0.97(0.89-1.06) |
| GGT (>50 vs. ≤50 IU/L) | 1.07(0.95-1.20) | 1.02(0.91-1.16) |

aORs were adjusted for all variables in the table. Abbreviations: OR, odds ratio; CI, confidence interval; BMI, body mass index; APN, acute pyelonephritis; BP, blood pressure; AST, [aspartate aminotransferase](https://www.google.co.kr/url?sa=t&rct=j&q=&esrc=s&source=web&cd=1&cad=rja&uact=8&ved=0ahUKEwipxf3thrjVAhXLk5QKHVrOCzMQFggmMAA&url=http%3A%2F%2Fwww.webmd.com%2Fdigestive-disorders%2Faspartate-aminotransferase-ast&usg=AFQjCNE5OgqJzfEVvOrkCupGTne1lNWpBQ); ALT, alanine aminotransferase; GGT, g[amma-glutamyl transferase](https://www.google.co.kr/url?sa=t&rct=j&q=&esrc=s&source=web&cd=1&cad=rja&uact=8&ved=0ahUKEwj8leSQh7jVAhVBpZQKHWSrCwsQFggmMAA&url=https%3A%2F%2Flabtestsonline.org%2Funderstanding%2Fanalytes%2Fggt%2Ftab%2Ftest%2F&usg=AFQjCNH3sQJAHW5SLa3QNgn3g_nUlg_HdA)
